# Supplementary material
Source: Atypon-hosted journal article supplement (doi:10.1287/isre.2024.1683)
Supplement: isre.2024.1683.sm1.pdf [file isre.2024.1683.sm1.pdf]

# Online Appendix (Supplement)

## Appendix A: Variable Definitions and Data Processing

This appendix provides variable definitions, sources, and data processing details, including transformations, imputation, and scaling.

Table A1: Data descriptions and transformations

| Source         | Variable             | Description and Transforms                  |
|----------------|----------------------|---------------------------------------------|
| CDC ACS 5-Year | hou_units_occupied   | Occupied housing units                      |
|                | hou_units_unoccupied | Unoccupied Housing units                    |
|                | hou_units_1_attached | Housing, one-unit attached                  |
|                | hou_units_mobile     | Mobile homes                                |
|                | hou_units_van        | Dwelling units that are boat, RV, van, etc. |
|                | hou_units_1          | Housing with 1 units                        |
|                | hou_units_2          | Housing with 2 units                        |
|                | hou_units_3          | Housing with 3 units                        |
|                | hou_units_4          | Housing with 4 units                        |
|                | hou_units_5          | Housing with 5 units                        |
|                | hou_units_6          | Housing with 6 units                        |
|                | hou_units_7          | Housing with 7 units                        |
|                | hou_units_8          | Housing with 8 units                        |
|                | hou_units_9_plus     | Housing with 9+ units                       |
|                | hou_age_since_2010   | Housing built since 2010                    |
|                | hou_age_2000         | Housing built 2000 to 2009                  |
|                | hou_age_1990         | Housing built 1990 to 1999                  |
|                | hou_age_1980         | Housing built 1980 to 1989                  |
|                | hou_age_1970         | Housing built 1970 to 1979                  |
|                | hou_age_1960         | Housing built 1960 to 1969                  |
|                | hou_age_1950         | Housing built 1950 to 1959                  |

Continued on next page

Table A1: Data descriptions and transformations (Continued)

| Source | Variable                               | Description and Transforms                                                   |
|--------|----------------------------------------|------------------------------------------------------------------------------|
|        | hou_age_1940                           | Housing built 1940 to 1949                                                   |
|        | hou_age_1939_plus                      | Housing older than 1939                                                      |
|        | hou_units_no_mortgage                  |                                                                              |
|        | hou_units_value_median_2022            |                                                                              |
|        | hou_units_mortgage_pymt_median         | If mortgaged, median mortgage amount in 2022 USD, CPI adjusted               |
|        | hou_units_gross_rent_median            | Housing units median gross rent in 2022 USD, CPI adjusted                    |
|        | hou_occupants_1_1.5                    | Housing crowding - Occupied housing units rate, people to room, 1.01 to 1.5  |
|        | hou_occupants_1.5_plus                 | Housing crowding - Occupied housing units rate, people to room, 1.51+        |
|        | hou_units_no_vehicle                   | Housing units with no vehicle                                                |
|        | eco_employment_in_labor_force          | Population older than 16 in the labor force                                  |
|        | eco_employment_in_civilian_labor_force | Population older than 16 in the civilian labor force                         |
|        | eco_employment_in_armed_force          | Population older than 16 in the armed forces                                 |
|        | eco_employment_not_in_labor_force      | Population not in the labor force                                            |
|        | eco_commute_single                     | Population older than 16 that drove alone to work                            |
|        | eco_commute_carpool                    | Population older than 16 that commuted to work.                              |
|        | eco_commute_public_transport           | Population older than 16 that used public transport to travel to work.       |
|        | eco_commute_walked                     | Population older than 16 that walked to work                                 |
|        | eco_commute_wfh                        | Population older than 16 that worked from home.                              |
|        | eco_commute_other                      | Population older than 16 that took an alternative form of transport to work. |

Continued on next page

Table A1: Data descriptions and transformations (Continued)

| Source | Variable              | Description and Transforms                                                                                                       |
|--------|-----------------------|----------------------------------------------------------------------------------------------------------------------------------|
|        | eco_occ_mgmt          | Proportion of reported occupations in management, business, science, and arts                                                    |
|        | eco_occ_svsc          | Proportion of reported occupations in services                                                                                   |
|        | eco_occ_sales         | Proportion of reported occupations in sales                                                                                      |
|        | eco_occ_mine          | Proportion of reported occupations in natural resources, construction, and maintenance                                           |
|        | eco_occ_trans         | Proportion of reported occupations in production, transportation, and material moving                                            |
|        | eco_ind_ag            | Proportion of reported occupations in agriculture, forestry, fishing and hunting, and mining                                     |
|        | eco_ind_construction  | Proportion of reported occupations in construction                                                                               |
|        | eco_ind_manufacturing | Proportion of reported occupations in manufacturing                                                                              |
|        | eco_ind_wholesale     | Proportion of reported occupations in wholesale                                                                                  |
|        | eco_ind_retail        | Proportion of reported occupations in retail                                                                                     |
|        | eco_ind_warehouse     | Proportion of reported occupations in transportation and warehousing, and utilities                                              |
|        | eco_ind_information   | Proportion of reported occupations in information                                                                                |
|        | eco_ind_finance       | Proportion of reported occupations in finance                                                                                    |
|        | eco_ind_prof          | Proportion of reported occupations in professional, scientific, and management, and administrative and waste management services |
|        | eco_ind_edu           | Proportion of reported occupations in educational services, and health care and social assistance                                |
|        | eco_ind_arts          | Proportion of reported occupations in arts, entertainment, and recreation, and accommodation and food services                   |
|        | eco_ind_other         | Proportion of reported occupations in other services, except public administration                                               |
|        | eco_ind_public_admin  | Proportion of reported occupations in public administration                                                                      |

Continued on next page 3

Table A1: Data descriptions and transformations (Continued)

| Source | Variable                           | Description and Transforms                                                                                        |
|--------|------------------------------------|-------------------------------------------------------------------------------------------------------------------|
|        | eco_income_hhld_ssi_2022           | Households with Supplemental Security Income                                                                      |
|        | eco_income_hhld_public_assist_2022 | Households with cash public assistance income. While 2022 is listed in the name, the variable is household count. |
|        | eco_income_hhld_snap               | Households with Food Stamp/SNAP benefits in the past 12 month                                                     |
|        | eco_income_mean_wages_2022         | Mean wages (2022 adjusted), log transformed                                                                       |
|        | eco_poverty_below                  | Households below the federal poverty limit                                                                        |
|        | eco_poverty_below_150_lvl          | Households below 150% the federal poverty limit, inclusive of the population below the federal poverty limit      |
|        | eco_health_ins_has_ins             | Population with insurance                                                                                         |
|        | eco_health_ins_public_ins          | Population with public health coverage                                                                            |
|        | soc_minority_race_ethnicity        | Population in a minority race or ethnicity (as defined in SVI, total population not white & non-hispanic.         |
|        | soc_elderly_pop                    | Population 65+                                                                                                    |
|        | soc_youth_pop                      | Population below 18                                                                                               |
|        | soc_birthrate                      | Proportion of population who are women in prime birth years, 20-34 years old                                      |
|        | soc_veteran                        | Veteran population                                                                                                |
|        | soc_family_comp_single_parent      | Households composed of single parents with minor-aged children                                                    |
|        | soc_family_comp_single_elderly     | Households composed of single, elderly individuals                                                                |
|        | soc_multigeneration                | Households with both grandparents and children                                                                    |
|        | soc_group_qtr_pop                  | Persons who are in institutional and non- institutional group homes                                               |
|        | soc_education_lt_9th               | Population with lower than high school population                                                                 |
|        | soc_education_9_12                 | Population with only partial high school education                                                                |
|        | soc_education_hs_grad              | Population with a high school degree.                                                                             |

Continued on next page

Table A1: Data descriptions and transformations (Continued)

| Source     | Variable                                | Description and Transforms                                         |
|------------|-----------------------------------------|--------------------------------------------------------------------|
|            | soc_education_bs_grad                   | Population with a college degree.                                  |
|            | soc_disability_pop                      | Population with a disability.                                      |
|            | soc_elderly_disability_non_inst_elderly | Elderly population with a disability and not in a shared facility. |
|            | soc_recent_move                         | Population that moved recently.                                    |
|            | soc_migrant_foreign_born                | Population that are foreign born.                                  |
|            | soc_migrant_foreign_born_not_citizen    | Population that are foreign born and not US citizens.              |
|            | soc_language_limited_english            | Population self-identifying as limited English proficiency.        |
|            | soc_computer_available                  | Households with a computer available.                              |
|            | soc_computer_broadband                  | Households with broadband available.                               |
| CDC Places | ho_arthritis_prevalence                 | Arthritis among adults                                             |
|            | ho_child_asthma_prevalence              | Asthma among children                                              |
|            | ho_bp_high_prevalence                   | High blood pressure among adults                                   |
|            | ho_cancer_prevalence                    | Cancer (non-skin) or melanoma among adults                         |
|            | ho_high_cholesterol_prevalence          | High cholesterol among adults who have ever been screened          |
|            | ho_kidney_prevalence                    | Chronic kidney disease among adults                                |
|            | ho_copd_prevalence                      | Chronic obstructive pulmonary disease among adults                 |
|            | ho_chd_prevalence                       | Coronary heart disease among adults                                |
|            | ho_diabetes_prevalence                  | Diagnosed diabetes among adults                                    |
|            | ho_obesity_prevalence                   | Obesity among adults                                               |
|            | ho_teeth_lost_prevalence                | All teeth lost among adults aged 65+ years                         |
|            | ho_stroke_prevalence                    | Stroke among adults                                                |
|            | pr_lack_of_insurance_prevalence         | Lack of health insurance among adults aged 18–64 years             |
|            | pr_annual_checkup_prevalence            | Routine checkup within the past year among adults                  |

Continued on next page

Table A1: Data descriptions and transformations (Continued)

| Source                                           | Variable                                  | Description and Transforms                                                                              |
|--------------------------------------------------|-------------------------------------------|---------------------------------------------------------------------------------------------------------|
|                                                  | pr_dental_visits_prevalence               | Visited dentist or dental clinic in the past year among adults                                          |
|                                                  | pr_bp_medicine_adhere_prevalence          | Taking medicine to control high blood pressure among adults with high blood pressure                    |
|                                                  | pr_cholesterol_screening_prevalence       | Cholesterol screening among adults                                                                      |
|                                                  | pr_mammography_use_prevalence             | Mammography use among women aged 50–74 years                                                            |
|                                                  | pr_cervical_cancer_screening_prevalence   | Cervical cancer screening among women aged 21–65 years                                                  |
|                                                  | pr_colorectal_cancer_screening_prevalence | Colorectal cancer screening among adults aged 45–75 years                                               |
|                                                  | pr_core_screenings_male_prevalence        | Older adults aged 65+ years who are up to date on a core set of clinical preventive services, male      |
|                                                  | pr_core_screenings_female_prevalence      | Older adults aged 65+ years who are up to date on a core set of clinical preventive services, female    |
|                                                  | hr_binge_drinking                         | Binge drinking among adults                                                                             |
|                                                  | hr_current_smoking                        | Current cigarette smoking among adults                                                                  |
|                                                  | hr_no_leisure_time                        | No leisure-time physical activity among adults                                                          |
|                                                  | hr_short_sleep_duration                   | Short sleep duration among adults                                                                       |
|                                                  | hs_physical_health_status_poor            | Frequent physical distress among adults                                                                 |
|                                                  | hs_mental_health_status_poor              | Frequent mental distress among adults                                                                   |
| OpenFema<br>Disaster<br>Declaration<br>Summaries | incident_Fire                             | Disaster declared as fire type                                                                          |
|                                                  | incident_Flood                            | Disaster declared as flood type                                                                         |
|                                                  | incident_Hurricane                        | Disaster declared as Hurricane type (including Tropical Storms during 2023 - 2025Q2 out-of-time period) |

Continued on next page

Table A1: Data descriptions and transformations (Continued)

| Source   | Variable                  | Description and Transforms                                                                                                                                                                                               |
|----------|---------------------------|--------------------------------------------------------------------------------------------------------------------------------------------------------------------------------------------------------------------------|
|          | incident_Severe Ice Storm | Disaster declared as severe ice storm                                                                                                                                                                                    |
|          | incident_Severe Storm     | Disaster declared as severe storm                                                                                                                                                                                        |
|          | incident_Tornado          |                                                                                                                                                                                                                          |
| FEMA IHP | total_need                | Count of households per disaster and per county registering any type of need with the US Federal Emergency Management Agency's Individual and Households Program                                                         |
|          | outcome_home_damage       | Count of households that reported home damage.                                                                                                                                                                           |
|          | outcome_auto_damage       | Count of households that reported auto damage.                                                                                                                                                                           |
|          | outcome_food_need         | Count of households that reported need for food                                                                                                                                                                          |
|          | outcome_shelter_need      | Count of households that reported need for shelter                                                                                                                                                                       |
|          | outcome_access_need       | Count of households that required special accommodations                                                                                                                                                                 |
|          | outcome_hab_repair_need   | Count of households that require repairs to make a dwelling habitable                                                                                                                                                    |
|          | outcome_emergency_need    | Count of households that report needs for emergency, life-sustaining items under Critical or Serious Needs assistance, such as water, food, first aid, prescriptions, infant formula, diapers, hygiene items, fuel, etc. |

**Note.** Census ACS and CDC Places data are proportion of unit within a county. Census is scaled 0 to 1, CDC Places 0 to 100. Scaling differences are immaterial for Random Forest and XGBoost architectures. Exceptions to scaling are `hou_units_mortgage_pymt_median`, `hou_units_gross_rent_median`, `hou_units_value_median_2022`, and `eco_income_mean_wages_2022`, which are adjusted from relative year of disaster to 2022 USD dollars using the US Bureau of Labor Statistics CPI, then have a log transform applied. Counties with FIPS codes 02261, 02063, and 02066 were removed due to inconsistent definition during time period. Connecticut counties (FIPS 09110, 09120, 09130, 09140, 09150, 09160, 09170, 09180, 09190) in 2022 are re-weighted to maintain consistency up through 2021 using AP News crosswalk. Counties 15001, 48301, 48261, 48269, 48301, 15051, 35059 each had between one and three fields that were missing for mortgage, rent, home value, or wages, and were filled with the field minimum populated value. ACS and CDC Places include 3,141 counties total, data treatment applied before combining to outcome data reported in Table 4.

## Appendix B: Model Training Fit Statistics

This appendix reports model training and validation results, including in-sample and out-of-sample MAE, MAPE,  $R^2$ , and RMSE across all need types and model architectures.

Table B1: Model Training Results

| Need            | Model   | Feature set | CV MAE   | CV MAE $\sigma$ | $R^2$    | RMSE     | MAE      | MAPE      |
|-----------------|---------|-------------|----------|-----------------|----------|----------|----------|-----------|
| Accessibility   | RF      | SVI         | 1.304271 | 0.072161        | 0.385500 | 1.725348 | 1.302756 | 40.036400 |
|                 | XGBoost | SVI         | 1.275307 | 0.066160        | 0.377618 | 1.736379 | 1.314030 | 39.684000 |
|                 | RF      | LIVA        | 1.182688 | 0.070941        | 0.489384 | 1.572761 | 1.171210 | 34.673300 |
|                 | XGBoost | LIVA        | 1.167228 | 0.070419        | 0.499152 | 1.557647 | 1.167285 | 34.593800 |
| Auto damage     | RF      | SVI         | 1.295517 | 0.056456        | 0.428086 | 1.667579 | 1.306766 | 48.249600 |
|                 | XGBoost | SVI         | 1.260609 | 0.051552        | 0.475714 | 1.596633 | 1.231995 | 45.436500 |
|                 | RF      | LIVA        | 1.167910 | 0.060467        | 0.512144 | 1.540163 | 1.182622 | 42.045900 |
|                 | XGBoost | LIVA        | 1.126864 | 0.074218        | 0.530756 | 1.510499 | 1.112570 | 39.460500 |
| Emergency items | RF      | SVI         | 1.498880 | 0.090026        | 0.443482 | 1.890685 | 1.480227 | 51.770000 |
|                 | XGBoost | SVI         | 1.450210 | 0.083762        | 0.452302 | 1.875643 | 1.461966 | 51.790800 |
|                 | RF      | LIVA        | 1.277337 | 0.088757        | 0.565600 | 1.670415 | 1.244116 | 45.490700 |
|                 | XGBoost | LIVA        | 1.291733 | 0.079160        | 0.581191 | 1.640164 | 1.204961 | 44.715800 |
| Food            | RF      | SVI         | 1.560076 | 0.057043        | 0.435081 | 1.961869 | 1.538606 | 52.306100 |
|                 | XGBoost | SVI         | 1.516792 | 0.075189        | 0.485545 | 1.872194 | 1.431270 | 48.541800 |
|                 | RF      | LIVA        | 1.302275 | 0.065394        | 0.568348 | 1.714920 | 1.296901 | 45.850900 |
|                 | XGBoost | LIVA        | 1.315835 | 0.069837        | 0.567928 | 1.715755 | 1.301683 | 45.897600 |
| Hab. repair     | RF      | SVI         | 1.295698 | 0.070373        | 0.321842 | 1.706097 | 1.264378 | 32.353600 |
|                 | XGBoost | SVI         | 1.300952 | 0.082708        | 0.319031 | 1.709629 | 1.275004 | 32.465000 |
|                 | RF      | LIVA        | 1.172462 | 0.076325        | 0.425090 | 1.570862 | 1.138288 | 28.685200 |
|                 | XGBoost | LIVA        | 1.199066 | 0.078072        | 0.388564 | 1.619995 | 1.189890 | 30.464000 |
| Home damage     | RF      | SVI         | 1.337741 | 0.061980        | 0.378344 | 1.703264 | 1.280582 | 36.477300 |

Continued on next page

Table B1: Model Training Results (Continued)

| Need       | Model   | Feature set | CV MAE   | CV MAE $\sigma$ | $R^2$    | RMSE     | MAE      | MAPE      |
|------------|---------|-------------|----------|-----------------|----------|----------|----------|-----------|
|            | XGBoost | SVI         | 1.314332 | 0.062473        | 0.395769 | 1.679223 | 1.256483 | 36.492900 |
|            | RF      | LIVA        | 1.155421 | 0.066970        | 0.499570 | 1.528194 | 1.092852 | 34.328400 |
|            | XGBoost | LIVA        | 1.177689 | 0.078987        | 0.487146 | 1.547047 | 1.086201 | 34.920400 |
| Shelter    | RF      | SVI         | 1.424392 | 0.058792        | 0.439027 | 1.778747 | 1.356176 | 47.948800 |
|            | XGBoost | SVI         | 1.389756 | 0.061200        | 0.489758 | 1.696413 | 1.277656 | 46.161900 |
|            | RF      | LIVA        | 1.262812 | 0.061112        | 0.540986 | 1.609001 | 1.203270 | 42.795600 |
|            | XGBoost | LIVA        | 1.255857 | 0.075491        | 0.566929 | 1.562871 | 1.161380 | 41.431900 |
| Total Need | RF      | SVI         | 1.357571 | 0.063387        | 0.379495 | 1.736925 | 1.304648 | 35.282700 |
|            | XGBoost | SVI         | 1.332627 | 0.088422        | 0.397252 | 1.711891 | 1.258372 | 35.289500 |
|            | RF      | LIVA        | 1.168668 | 0.071447        | 0.498042 | 1.562219 | 1.122159 | 33.122400 |
|            | XGBoost | LIVA        | 1.180421 | 0.068914        | 0.492657 | 1.570577 | 1.102133 | 33.365100 |

**Note.** CV fit statistics ( $MAE$ ,  $MAE\sigma$ ) are calculated from 5 folds and 3 randomized repetitions. Statistics not labeled as CV are from the Test dataset.

## Appendix C: Robustness and Sensitivity Analyses

We conducted a controlled comparison where both LIVA and SVI use exactly 22 features, in order to parsimoniously match the number of potential features at the same count and show whether LIVA performs better simply due to more features. In this equal-feature-count comparison, LIVA-Top22 (using Random Forest-selected features) outperforms SVI-22 across nearly all outcomes, demonstrating that the improvement comes from identifying better predictors, not just having more of them. LIVA retains 4-6 of SVI's 22 features, replacing 16-18 of SVI's traditional vulnerability indicators with more predictive alternatives. The SVI features kept were race/ethnicity, mobile homes, and mortgage payments, while LIVA identifies predictors such as professional industry employment, preventive care screening rates (as health access proxies), and housing economic indicators. The outcomes can be seen in Figure C1.

Figure C1 MAE Comparison for LIVA and SVI restricted sets.

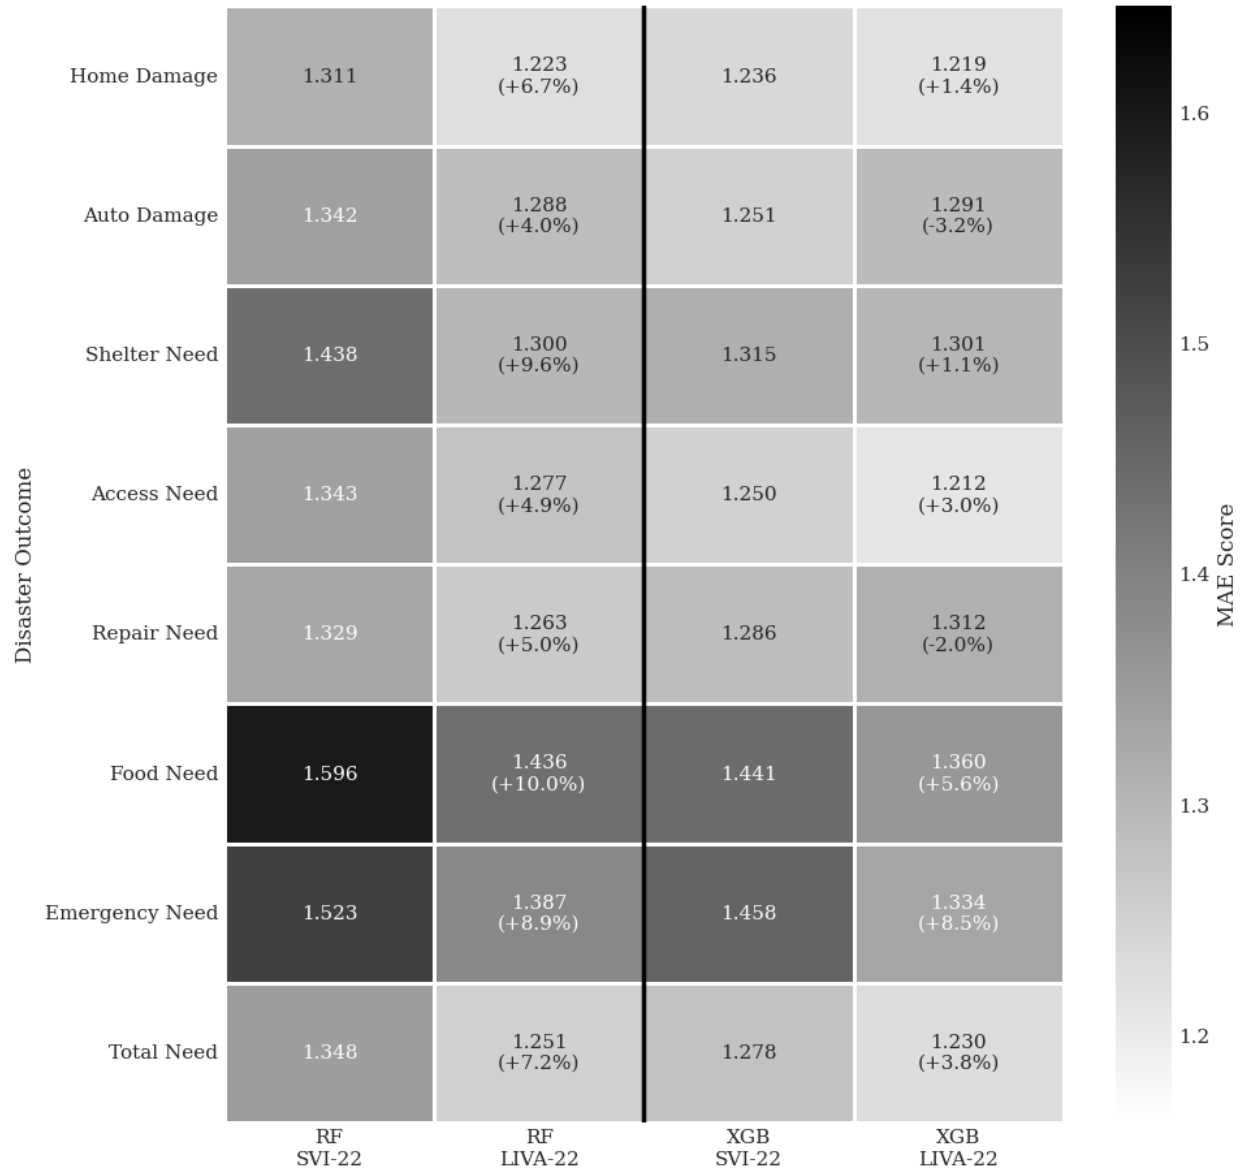

Note. Improvements shown in parentheses.

## Appendix D: Interpretability and Diagnostics

In this section, we provide exhibits related to model interpretability, including feature importance, SHAP, and PDP plots.

The top 25 variables, identified by average mean feature importance across all LIVA models, are presented in Figure-D1. The values shown are the average importance across model architectures (Random Forest and XGBoost), and show that different features have significant differences in feature importance. This highlights that each LIVA need-hazard model draws on a distinct set of drivers, yet several predictors repeatedly rank highly across tasks (e.g., hurricane incident exposure, median gross rent, employment in professional industries, foreign-born population share, preventive-care utilization, and housing age). To guard against metric-specific artifacts, we corroborate these rankings with permutation-based importance and SHAP attributions, which yield overlapping top predictors and consistent directionality. Importances are model-based summaries and should be interpreted as relative contributions to prediction rather than causal effects.

Shapley values reveal how different forms of need are driven by distinct community features. Figure-D2 displays the top five predictors for a sample of the need's Random Forest models, organized by type of need. In all cases, a Hurricane incident strongly increase predicted need. Beyond this, the features diverge considerably across need types: models for Accessibility Need emphasize household-related variables such as housing age and rental costs (e.g., `hou_units_gross_rent_median`, `hou_age_1939_plus`), while Food, Emergency Items, and Total Needs surface social and health-related factors, including screening rates and foreign-born populations (e.g., `pr_cholesterol_screening_prevalence`, `soc_migrant_foreign_born`). The SHAP plots also illustrate directionality and interaction: when high-value records (lighter coloring) cluster on the right, the feature acts monotonically to increase need; when colors are mixed (gray color) on both sides, effects are more heterogeneous. This variation suggests that while hazard exposure is a common base, each type of need reflects distinct social and spatial vulnerabilities.

**Figure D1 Feature Importances for LIVA-22 and SVI-22 restricted sets.**

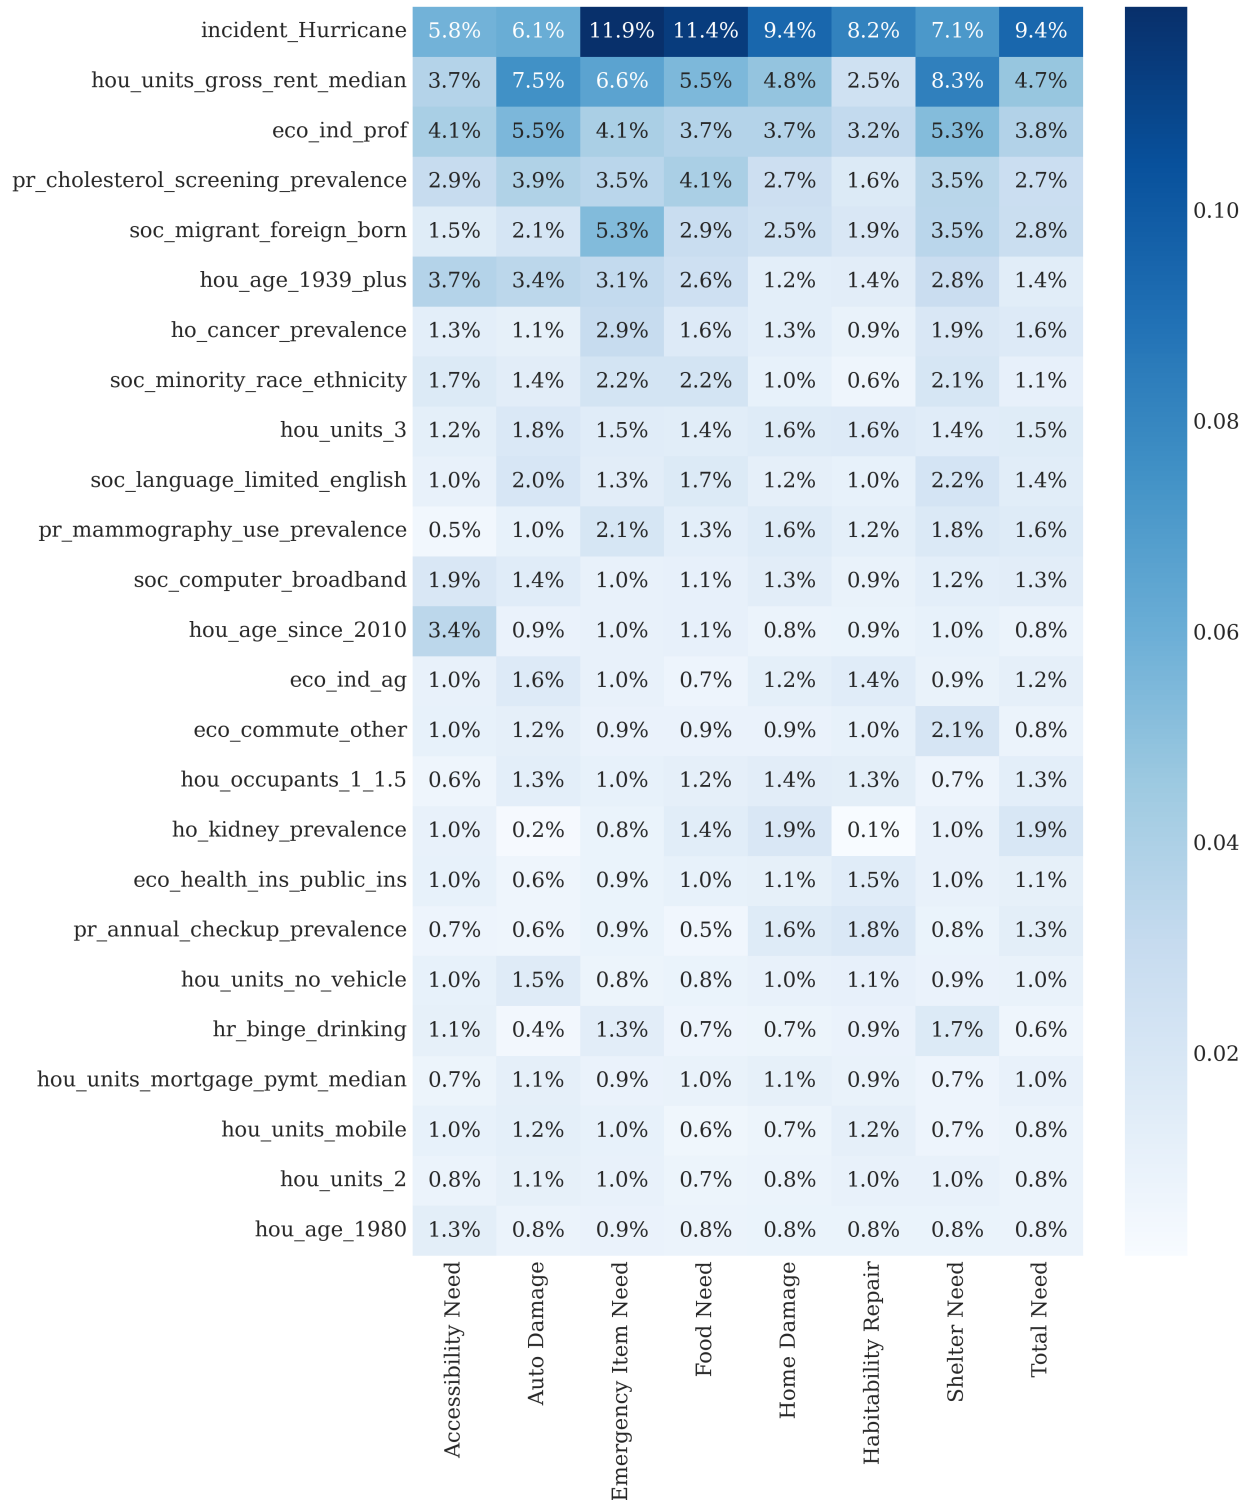

*Note.* Average Feature importance across Random Forest and XGBoost architectures for each need and for each feature in the top 25 features.

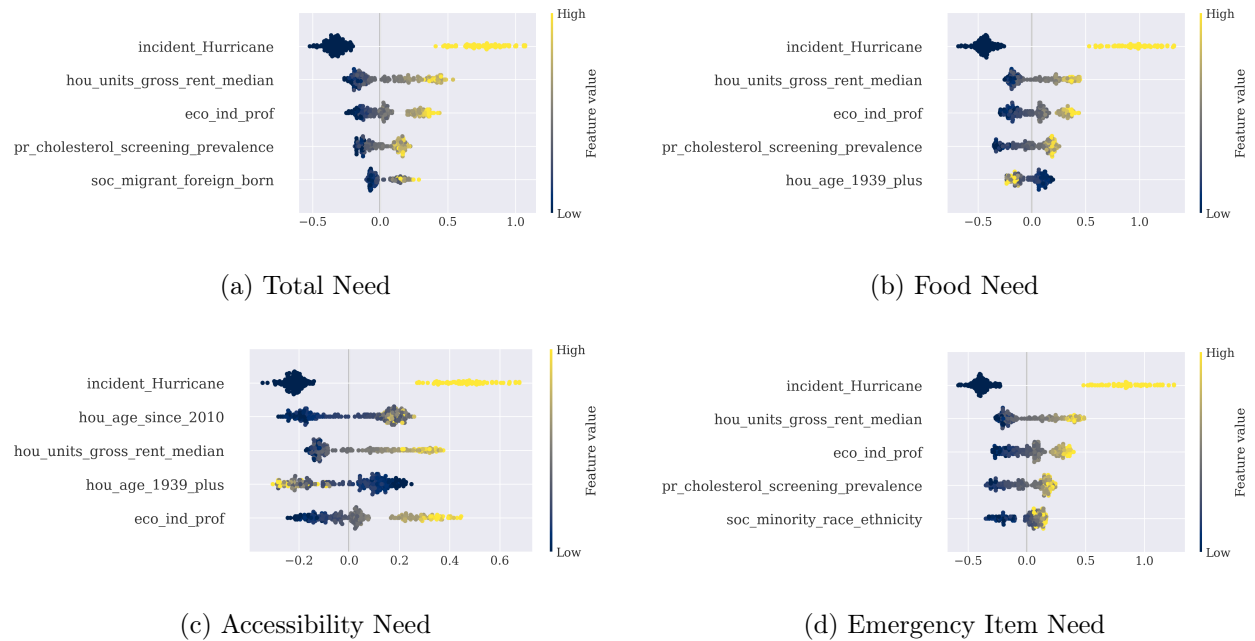

**Figure D2** Shapley values for LIVA Random Forest for Total Need, Food Need, Accessibility Need, Emergency Item Need.

We finish this section by presenting partial dependence plots (PDPs) for three variables that appeared frequently among the top features across models and need types. These plots illustrate how predicted need varies on average as the value of each variable changes, marginalizing over other features. Figure D3 shows PDPs for: (a) the binary indicator for hurricane exposure, (b) median gross rent (log-transformed), and (c) the prevalence of cholesterol screening. Each curve represents a different model–need pairing, allowing comparison across both architecture and outcome type.

The hurricane indicator shows a consistent and steep increase in predicted need across all models, reaffirming its dominant role in need prediction. The effect of housing cost (log rent) is nonlinear: moderate rent values are associated with slightly elevated need, but very high rent correlates with decreasing need, possibly reflecting wealthier and more resilient areas. In contrast, cholesterol screening shows a monotonic and inverse relationship—higher prevalence is associated with lower predicted need—indicating that access to preventive care acts as a strong proxy for social and health resilience, particularly in the food and emergency need models.

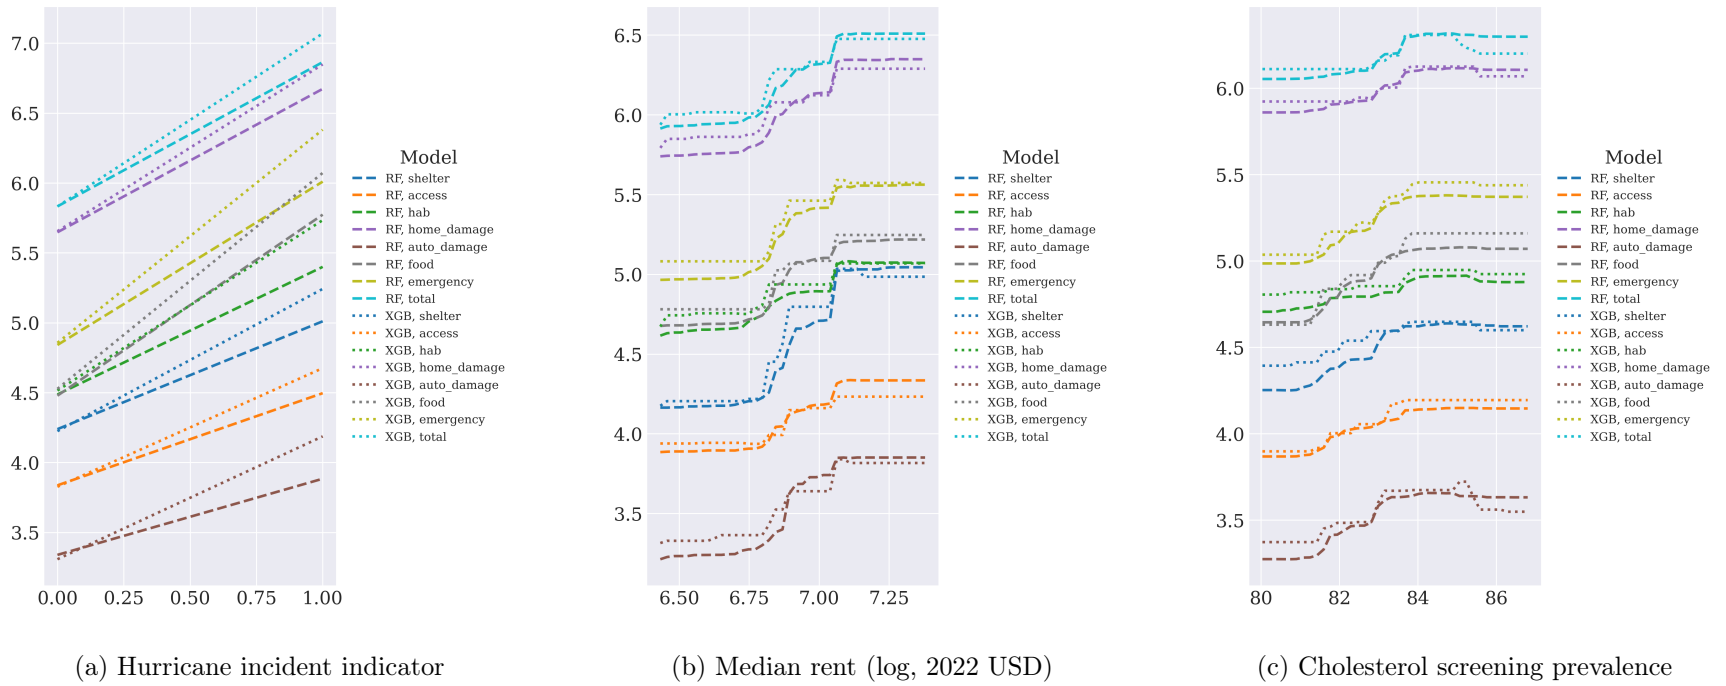

**Figure D3** Partial dependence plots for three top features across LIVA models and need types. Each line represents a model–need combination. (a) Hurricane exposure increases predicted need. (b) Median rent shows a nonlinear relationship with need. (c) A higher prevalence of cholesterol screening reduces the predicted need.

## Appendix E: Ablation Analysis

As a complementary extension of the ablation analysis, Figure E1 illustrates how model performance deteriorates as groups of features are cumulatively removed from the Random Forest models across all need types. The x-axis represents the progressive exclusion of feature groups (e.g., housing, socioeconomic, health, hazard), while the y-axis tracks the resulting increase in mean absolute error (MAE). This cumulative ablation curve serves as a diagnostic to reveal the marginal value of each group in the predictive stack.

The shape of the curve highlights the relative importance of the feature sets, which were ranked by total group feature importance on the full model. An initially flat trajectory followed by steep increases indicates that the earliest-removed groups were less critical, while subsequent removals degrade performance more sharply. This indicates that the model was not reliant solely on the most important feature groups.

While the plot focuses on Random Forest models, similar patterns are observed for XGBoost, suggesting robustness across architectures. Together, these curves reinforce that predictive strength is not aligned with specific feature domains, but jointly excluding the groups can significantly reduce performance.

**Figure E1** Cumulative MAE change across need models as groups are removed.

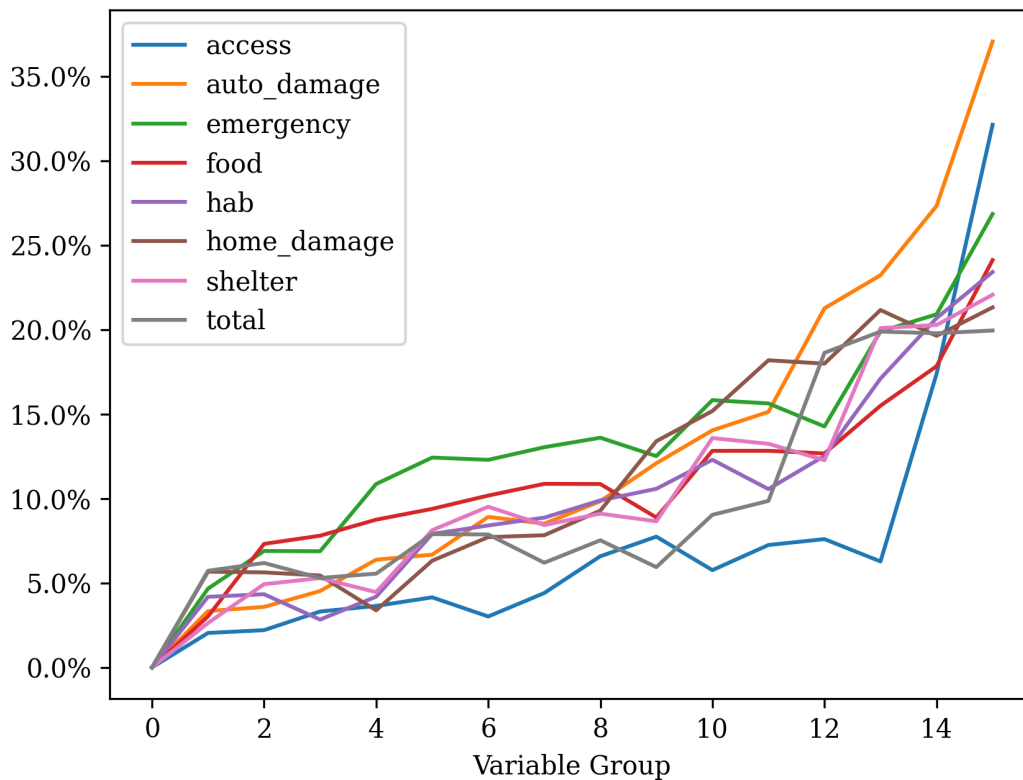

## Appendix F: SVI vs. Non-SVI Feature Importance

This section examines the relative cumulative importance of features that are part of the CDC SVI versus those that are not, based on the feature importance rankings from the full LIVA model used during the ablation study. The SVI group comprises 22 features that constitute the CDC-defined SVI domains, including socioeconomic status, household composition, minority status, and housing type/transportation.

**Figure F1** Proportion of features sourcing from SVI.

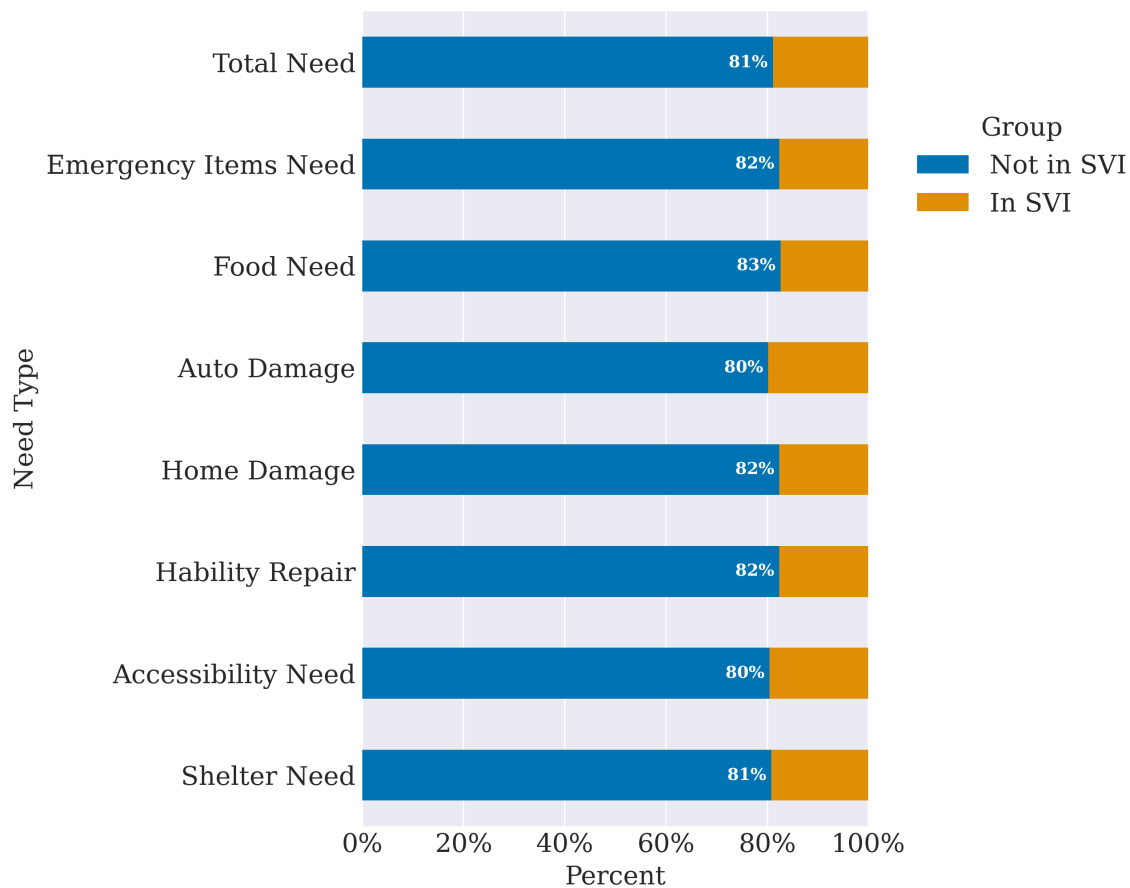

As shown in Figure F1, the SVI feature set consistently accounts for approximately 20% of total feature importance across all ablation study models and outcome types. This indicates that while SVI-based features contribute meaningfully, the bulk of predictive power comes from non-SVI variables—such as housing age, health behavior indicators, or disaster context—not included in the CDC index. Note that this comparison reflects only the contribution of the features as used in the full model, not causality.

These results suggest that while SVI variables remain relevant, the models rely more heavily on broader feature sets to explain variation in need. This underscores the value of extending beyond predefined indices like the CDC SVI when building data-driven models for post-disaster response.

## Appendix G: Binary Risk Classification Results

One possible use for LIVA is to assign *a priori* classifications of need (e.g., high vs. low) based on predicted scores. To demonstrate this use, we define a binary risk classifier by applying a threshold of 0.5 to a min–max normalized transformation of the relevant training set field (e.g., log-transformed need, LIVA RF/XGBoost predictions, SVI, or SoVI scores).

Table G1 reports classification performance, averaged across all identified need types. Both LIVA models (XGBoost) achieve a favorable balance of precision and recall, with F1-scores near 0.80 and AUC values between 0.843 and 0.882 in testing and out-of-time datasets. By contrast, the SVI score attains higher recall but at the expense of precision, reflected in lower overall F1 and AUC values. The SoVI has poor precision and recall across both test and out-of-time datasets.

**Table G1** Classification metrics for high or low identified need

| Model - OOT  | Precision | Recall | F1    | AUC   |
|--------------|-----------|--------|-------|-------|
| LIVA RF      | 0.821     | 0.738  | 0.772 | 0.847 |
| LIVA XGB     | 0.795     | 0.798  | 0.794 | 0.843 |
| SVI          | 0.645     | 0.837  | 0.726 | 0.711 |
| SoVI         | 0.279     | 0.116  | 0.160 | 0.509 |
| Model - Test |           |        |       |       |
| LIVA RF      | 0.821     | 0.8055 | 0.807 | 0.882 |
| LIVA XGB     | 0.759     | 0.841  | 0.796 | 0.874 |
| SVI          | 0.556     | 0.832  | 0.666 | 0.612 |
| SoVI         | 0.152     | 0.106  | 0.122 | 0.405 |

Metrics aggregated across need types.
